# Supplementary material for: Gain- and Loss-of-Function CFTR Alleles Are Associated with COVID-19 Clinical Outcomes
Source: MDPI journal article supplement (doi:10.3390/cells11244096), 2022-12-16
Supplement: s1 [file s1]

**§ GEN-COVID Multicenter Study (<https://sites.google.com/dbm.unisi.it/gen-covid>)**

Francesca Mari<sup>1,2,3</sup>, Sergio Daga<sup>1,2</sup>, Ilaria Meloni<sup>1,2</sup>, Diana Alaverdian<sup>1,2</sup>, Giada Beligni<sup>1,2</sup>, Gabriella Doddato<sup>1,2</sup>, Mirjam Lista<sup>1,2</sup>, Debora Maffeo<sup>1,2</sup>, Elena Pasquinelli<sup>1,2</sup>, Loredaria Adamo<sup>1,2</sup>, Viola Bianca Serio<sup>1,2</sup>, Enrica Antolini<sup>1,2</sup>, Giulia Brunelli<sup>2</sup>, Rossella Tita<sup>3</sup>, Maria Antonietta Mencarelli<sup>3</sup>, Caterina Lo Rizzo<sup>3</sup>, Anna Maria Pinto<sup>3</sup>, Francesca Ariani<sup>1,2,3</sup>, Francesca Montagnani<sup>2,4</sup>, Mario Tumbarello<sup>2,4</sup>, Ilaria Rancan<sup>2,4</sup>, Massimiliano Fabbiani<sup>4</sup>, Elena Bargagli<sup>5</sup>, Laura Bergantini<sup>5</sup>, Miriana D'Alessandro<sup>5</sup>, Paolo Cameli<sup>5</sup>, David Bennett<sup>5</sup>, Federico Anedda<sup>6</sup>, Simona Marcantonio<sup>6</sup>, Sabino Scolletta<sup>6</sup>, Federico Franchi<sup>6</sup>, Maria Antonietta Mazzei<sup>7</sup>, Susanna Guerrini<sup>7</sup>, Edoardo Conticini<sup>8</sup>, Luca Cantarini<sup>8</sup>, Bruno Frediani<sup>8</sup>, Danilo Tacconi<sup>9</sup>, Chiara Spertilli Raffaelli<sup>9</sup>, Arianna Emiliozzi<sup>9</sup>, Marco Feri<sup>10</sup>, Alice Donati<sup>10</sup>, Raffaele Scala<sup>11</sup>, Luca Guidelli<sup>11</sup>, Genni Spargi<sup>12</sup>, Marta Corridi<sup>12</sup>, Cesira Nencioni<sup>13</sup>, Leonardo Croci<sup>13</sup>, Gian Piero Caldarelli<sup>14</sup>, Davide Romani<sup>15</sup>, Paolo Piacentini<sup>15</sup>, Maria Bandini<sup>15</sup>, Elena Desanctis<sup>15</sup>, Silvia Cappelli<sup>15</sup>, Anna Canaccini<sup>16</sup>, Agnese Verzuri<sup>16</sup>, Valentina Anemoli<sup>16</sup>, Manola Pisani<sup>16</sup>, Agostino Ognibene<sup>17</sup>, Maria Lorubbio<sup>17</sup>, Alessandro Pancrazzi<sup>17</sup>, Massimo Vaghi<sup>18</sup>, Antonella D'Arminio Monforte<sup>19</sup>, Federica Gaia Miraglia<sup>19</sup>, Mario U. Mondelli<sup>20,21</sup>, Stefania Mantovani<sup>20</sup>, Raffaele Bruno<sup>20,22</sup>, Marco Vecchia<sup>20</sup>, Marcello Maffezzoni<sup>22</sup>, Enrico Martinelli<sup>23</sup>, Massimo Girardis<sup>24</sup>, Stefano Busani<sup>24</sup>, Sophie Venturelli<sup>24</sup>, Andrea Cossarizza<sup>25</sup>, Andrea Antinori<sup>26</sup>, Alessandra Vergori<sup>26</sup>, Stefano Rusconi<sup>27,28</sup>, Matteo Siano<sup>28</sup>, Arianna Gabrieli<sup>28</sup>, Agostino Riva<sup>27,28</sup>, Daniela Francisci<sup>29</sup>, Elisabetta Schiaroli<sup>29</sup>, Carlo Pallotto<sup>29</sup>, Saverio Giuseppe Parisi<sup>30</sup>, Monica Basso<sup>30</sup>, Sandro Panese<sup>31</sup>, Stefano Baratti<sup>31</sup>, Pier Giorgio Scotton<sup>32</sup>, Francesca Andretta<sup>32</sup>, Mario Giobbia<sup>32</sup>, Renzo Scaggiante<sup>33</sup>, Francesca Gatti<sup>33</sup>, Francesco Castelli<sup>34</sup>, Eugenia Quiros-Roldan<sup>34</sup>, Melania Degli Antoni<sup>34</sup>, Isabella Zanella<sup>35,36</sup>, Matteo della Monica<sup>37</sup>, Carmelo Piscopo<sup>37</sup>, Mario Capasso<sup>38,39</sup>, Roberta Russo<sup>38,39</sup>, Immacolata Andolfo<sup>38,39</sup>, Achille Iolascon<sup>38,39</sup>, Giuseppe Fiorentino<sup>40</sup>, Massimo Carella<sup>41</sup>, Marco Castori<sup>41</sup>, Giuseppe Merla<sup>38,42</sup>, Gabriella Maria Squeo<sup>42</sup>, Filippo Aucella<sup>43</sup>, Pamela Raggi<sup>44</sup>, Rita Perna<sup>44</sup>, Matteo Bassetti<sup>45,46</sup>, Antonio Di Biagio<sup>45,46</sup>, Maurizio Sanguinetti<sup>47,48</sup>, Luca Masucci<sup>47,48</sup>, Alessandra Guarnaccia<sup>47</sup>, Serafina Valente<sup>49</sup>, Alex Di Florio<sup>49</sup>, Marco Mandalà<sup>50</sup>, Alessia Giorli<sup>50</sup>, Lorenzo Salerno<sup>50</sup>, Patrizia Zucchi<sup>51</sup>, Pierpaolo Parravicini<sup>51</sup>, Elisabetta Menatti<sup>52</sup>, Tullio Trotta<sup>53</sup>, Ferdinando Giannattasio<sup>53</sup>, Gabriella Coiro<sup>53</sup>, Fabio Lena<sup>54</sup>, Gianluca Lacerenza<sup>54</sup>, Cristina Mussini<sup>55</sup>, Luisa Tavecchia<sup>56</sup>, Lia Crotti<sup>57,58,59,60,61</sup>, Gianfranco Parati<sup>57,58</sup>, Roberto Menè<sup>57,58</sup>, Maurizio Sanarico<sup>62</sup>, Marco Gori<sup>63,64</sup>, Francesco Raimondi<sup>65</sup>, Alessandra Stella<sup>65</sup>, Filippo Biscarini<sup>66</sup>, Tiziana Bachetti<sup>67</sup>, Maria Teresa La Rovere<sup>68</sup>, Maurizio Bussotti<sup>69</sup>, Serena Ludovisi<sup>70</sup>, Katia Capitani<sup>71</sup>, Simona Dei<sup>72</sup>, Sabrina Ravaglia<sup>73</sup>, Annarita Giliberti<sup>74</sup>, Giulia Gori<sup>74</sup>, Rosangela Artuso<sup>74</sup>, Elena Andreucci<sup>74</sup>, Angelica Pagliuzzi<sup>74</sup>, Erika Fiorentini<sup>74</sup>, Antonio Perrella<sup>75</sup>, Francesco Bianchi<sup>2,75</sup>, Paola Bergomi<sup>76</sup>, Emanuele Catena<sup>76</sup>, Riccardo Colombo<sup>76</sup>, Sauro Luchi<sup>77</sup>, Giovanna Morelli<sup>77</sup>, Paola Petrocelli<sup>77</sup>, Sarah Iacopini<sup>77</sup>, Sara Modica<sup>77</sup>, Silvia Baroni<sup>78</sup>, Giulia Micheli<sup>79</sup>, Marco Falcone<sup>80</sup>, Donato Urso<sup>80</sup>, Giusy Tiseo<sup>80</sup>, Tommaso Matucci<sup>80</sup>, Davide Grassi<sup>81</sup>, Claudio Ferri<sup>81</sup>, Franco Marinangeli<sup>82</sup>, Francesco Brancati<sup>83,84</sup>, Antonella Vincenti<sup>85</sup>, Valentina Borgo<sup>85</sup>, Stefania Lombardi<sup>85</sup>, Mirco Lenzi<sup>85</sup>, Massimo Antonio Di

Pietro<sup>86</sup>, Francesca Vichi<sup>86</sup>, Benedetta Romanin<sup>86</sup>, Letizia Attala<sup>86</sup>, Cecilia Costa<sup>86</sup>, Andrea Gabbuti<sup>86</sup>, Alessio Bellucci<sup>86</sup>, Marta Colaneri<sup>22</sup>, Patrizia Casprini<sup>87</sup>, Cristoforo Pomara<sup>88</sup>, Massimiliano Esposito<sup>88</sup>, Roberto Leoncini<sup>89</sup>, Michele Cirianni<sup>89</sup>, Lucrezia Galasso<sup>89</sup>, Marco Antonio Bellini<sup>90</sup>

- 1) Medical Genetics, University of Siena, Siena, 53100, Italy
- 2) Med Biotech Hub and Competence Center, Department of Medical Biotechnologies, University of Siena, Siena, 53100, Italy
- 3) Genetica Medica, Azienda Ospedaliero-Universitaria Senese, Siena, 53100, Italy
- 4) Department of Medical Sciences, Infectious and Tropical Diseases Unit, Azienda Ospedaliera Universitaria Senese, Siena, Italy
- 5) Unit of Respiratory Diseases and Lung Transplantation, Department of Internal and Specialist Medicine, University of Siena, Italy
- 6) Dept of Emergency and Urgency, Medicine, Surgery and Neurosciences, Unit of Intensive Care Medicine, Siena University Hospital, Italy
- 7) Department of Medical, Surgical and Neuro Sciences and Radiological Sciences, Unit of Diagnostic Imaging, University of Siena, Italy
- 8) Rheumatology Unit, Department of Medicine, Surgery and Neurosciences, University of Siena, Policlinico Le Scotte, Italy
- 9) Department of Specialized and Internal Medicine, Infectious Diseases Unit, San Donato Hospital Arezzo, Italy
- 10) Department of Emergency, Anesthesia Unit, San Donato Hospital, Arezzo, Italy
- 11) Department of Specialized and Internal Medicine, Pneumology Unit and UTIP, San Donato Hospital, Arezzo, Italy
- 12) Department of Emergency, Anesthesia Unit, Misericordia Hospital, Grosseto, Italy
- 13) Department of Specialized and Internal Medicine, Infectious Diseases Unit, Misericordia Hospital, Grosseto, Italy
- 14) Clinical Chemical Analysis Laboratory, Misericordia Hospital, Grosseto, Italy
- 15) Dipartimento di Prevenzione, Azienda USL Toscana Sud Est, Italy
- 16) Dipartimento Tecnico-Scientifico Territoriale, Azienda USL Toscana Sud Est, Italy
- 17) UOC Laboratorio Analisi Chimico Cliniche, Arezzo, Italy
- 18) Chirurgia Vascolare, Ospedale Maggiore di Crema, Italy
- 19) Department of Health Sciences, Clinic of Infectious Diseases, ASST Santi Paolo e Carlo, University of Milan, Italy
- 20) Division of Clinical Immunology - Infectious Diseases, Department of Medicine, Fondazione IRCCS Policlinico San Matteo, Pavia, Italy
- 21) Department of Internal Medicine and Therapeutics, University of Pavia, Italy

- 22) University of Pavia, Pavia, Italy
- 23) Department of Respiratory Diseases, Azienda Ospedaliera di Cremona, Cremona, Italy
- 24) Department of Anesthesia and Intensive Care, University of Modena and Reggio Emilia, Modena, Italy
- 25) Department of Medical and Surgical Sciences for Children and Adults, University of Modena and Reggio Emilia, Modena, Italy
- 26) HIV/AIDS Department, National Institute for Infectious Diseases, IRCCS, Lazzaro Spallanzani, Rome, Italy
- 27) III Infectious Diseases Unit, ASST-FBF-Sacco, Milan, Italy
- 28) Department of Biomedical and Clinical Sciences Luigi Sacco, University of Milan, Milan, Italy
- 29) Infectious Diseases Clinic, "Santa Maria della Misericordia" Hospital, University of Perugia, Perugia, Italy
- 30) Department of Molecular Medicine, University of Padova, Italy
- 31) Clinical Infectious Diseases, Mestre Hospital, Venezia, Italy.
- 32) Department of Infectious Diseases, Treviso Hospital, Local Health Unit 2 Marca Trevigiana, Treviso, Italy
- 33) Infectious Diseases Clinic, ULSS1, Belluno, Italy
- 34) Department of Infectious and Tropical Diseases, University of Brescia and ASST Spedali Civili Hospital, Brescia, Italy
- 35) Department of Molecular and Translational Medicine, University of Brescia, Italy;
- 36) Clinical Chemistry Laboratory, Cytogenetics and Molecular Genetics Section, Diagnostic Department, ASST Spedali Civili di Brescia, Italy
- 37) Medical Genetics and Laboratory of Medical Genetics Unit, A.O.R.N. "Antonio Cardarelli", Naples, Italy
- 38) Department of Molecular Medicine and Medical Biotechnology, University of Naples Federico II, Naples, Italy
- 39) CEINGE Biotechnologie Avanzate, Naples, Italy
- 40) Unit of Respiratory Physiopathology, AORN dei Colli, Monaldi Hospital, Naples, Italy
- 41) Division of Medical Genetics, Fondazione IRCCS Casa Sollievo della Sofferenza Hospital, San Giovanni Rotondo, Italy
- 42) Laboratory of Regulatory and Functional Genomics, Fondazione IRCCS Casa Sollievo della Sofferenza
- 43) Department of Medical Sciences, Fondazione IRCCS Casa Sollievo della Sofferenza Hospital, San Giovanni Rotondo, Italy
- 44) Clinical Trial Office, Fondazione IRCCS Casa Sollievo della Sofferenza Hospital, San Giovanni Rotondo, Italy
- 45) Department of Health Sciences, University of Genova, Genova, Italy

- 46) Infectious Diseases Clinic, Policlinico San Martino Hospital, IRCCS for Cancer Research  
Genova, Italy
- 47) Microbiology, Fondazione Policlinico Universitario Agostino Gemelli IRCCS, Catholic  
University of Medicine, Rome, Italy
- 48) Department of Laboratory Sciences and Infectious Diseases, Fondazione Policlinico  
Universitario A. Gemelli IRCCS, Rome, Italy
- 49) Department of Cardiovascular Diseases, University of Siena, Siena, Italy
- 50) Otolaryngology Unit, University of Siena, Italy
- 51) Department of Internal Medicine, ASST Valtellina e Alto Lario, Sondrio, Italy
- 52) Study Coordinator Oncologia Medica e Ufficio Flussi Sondrio, Italy
- 53) First Aid Department, Luigi Curto Hospital, Polla, Salerno, Italy
- 54) Department of Pharmaceutical Medicine, Misericordia Hospital, Grosseto, Italy.
- 55) Infectious Diseases Clinics, University of Modena and Reggio Emilia
- 56) U.O.C. Medicina, ASST Nord Milano, Ospedale Bassini, Cinisello Balsamo (MI), Italy
- 57) Istituto Auxologico Italiano, IRCCS, Department of Cardiovascular, Neural and Metabolic  
Sciences, San Luca Hospital, Milan, Italy
- 58) Department of Medicine and Surgery, University of Milano-Bicocca, Milan, Italy
- 59) Istituto Auxologico Italiano, IRCCS, Center for Cardiac Arrhythmias of Genetic Origin, Milan,  
Italy
- 60) Istituto Auxologico Italiano, IRCCS, Laboratory of Cardiovascular Genetics, Milan, Italy
- 61) Member of the European Reference Network for Rare, Low Prevalence and Complex Diseases  
of the Heart-ERN GUARD-Heart
- 62) Independent Data Scientist, Milan, Italy
- 63) University of Siena, DIISM-SAILAB, Siena, Italy
- 64) Maasai, I3S CNRS, Université Côte d'Azur, France
- 65) Laboratorio di Biologia Bio@SNS, Scuola Normale Superiore, Pisa, Italy
- 66) CNR-Consiglio Nazionale delle Ricerche, Istituto di Biologia e Biotecnologia Agraria (IBBA),  
Milano, Italy
- 67) Direzione Scientifica, Istituti Clinici Scientifici Maugeri IRCCS, Pavia, Italy
- 68) Istituti Clinici Scientifici Maugeri IRCCS, Department of Cardiology, Institute of Montescano,  
Pavia, Italy
- 69) Istituti Clinici Scientifici Maugeri IRCCS, Department of Cardiology, Institute of Milan, Italy
- 70) Fondazione IRCCS Ca' Granda Ospedale Maggiore Policlinico, Milan, Italy
- 71) Core Research Laboratory, ISPRO, Florence, Italy
- 72) Health Management, Azienda USL Toscana Sud Est, Tuscany, Italy
- 73) IRCCS C. Mondino Foundation, Pavia, Italy
- 74) Medical Genetics Unit, Meyer Children's University Hospital

- 75) Department of Medicine, Pneumology Unit, Misericordia Hospital, Grosseto, Italy.
- 76) Department of Anesthesia and Intensive Care Unit, ASST Fatebenefratelli Sacco, Luigi Sacco Hospital, Polo Universitario, University of Milan, Milan
- 77) Infectious Disease Unit, Hospital of Lucca, Italy
- 78) Department of Diagnostic and Laboratory Medicine, Institute of Biochemistry and Clinical Biochemistry, Fondazione Policlinico Universitario A. Gemelli IRCCS, Catholic University of the Sacred Heart, Rome, Italy.
- 79) Clinic of Infectious Diseases, Catholic University of the Sacred Heart, Rome, Italy
- 80) Department of Clinical and Experimental Medicine, Infectious Diseases Unit, University of Pisa, Pisa, Italy
- 81) Department of Clinical Medicine, Public Health, Life and Environment Sciences, University of L'Aquila, Italy
- 82) Anesthesiology and Intensive Care, University of L'Aquila, L'Aquila, Italy
- 83) Department of Life, Health and Environmental Sciences, University of L'Aquila, 67100, L'Aquila, Italy
- 84) Human Functional Genomics Laboratory, IRCCS San Raffaele Roma, 00167, Rome, Italy
- 85) Infectious Disease Unit, Hospital of Massa, Italy
- 86) Infectious Diseases Unit, Santa Maria Annunziata Hospital, USL Centro, Florence, Italy
- 87) Laboratory of Clinical Pathology and Immunoallergy, Florence-Prato, Italy
- 88) Department of Medical, Surgical and Advanced Technologies "G.F. Ingrassia", University of Catania, Catania, Italy
- 89) Laboratorio Patologia Clinica, Azienda Ospedaliero-Universitaria Senese
- 90) Ambulatory Chronic Polipathology of Siena, Department of Medicine, Surgery and Neurosciences, University of Siena, Siena, Italy
